# Supplementary material for: Cytosine-phosphodiester-guanine oligodeoxynucleotide (CpG ODN)-capped hollow mesoporous silica particles for enzyme-triggered drug delivery
Source: Royal Society of Chemistry journal article supplement (doi:10.1039/c1dt11114k), 2011-01-01
Supplement: c1dt11114k.pdf [file c1dt11114k.pdf]

## Supporting Information

### **Cytosine-phosphodiester-Guanine Oligodeoxynucleotide (CpG ODN)-Capped Hollow Mesoporous Silica Particles for Enzyme-Triggered Drug Delivery**

Yufang Zhu<sup>a\*</sup>, Wenjun Meng<sup>b</sup>, Nobutaka Hanagata<sup>b,c</sup>

- a) *School of Materials Science and Engineering, University of Shanghai for Science and Technology, 516 Jungong Road, Shanghai, 200093, P. R. China.*
- b) *Graduate School of Life Science, Hokkaido University, N10W8, Kita-ku, Sapporo, 060-0812, Japan.*
- c) *Interdisciplinary Laboratory for Nanoscale Science and Technology, National Institute for Materials Science, 1-2-1 Sengen, Tsukuba, Ibaraki, 305-0047, Japan.*

#### **Corresponding author:**

Dr. Yufang Zhu:

Tel: +86-21-55271663

Email: [zjf2412@163.com](mailto:zjf2412@163.com)

**Preparation of hollow mesoporous spheres (HMS) particles:**

**Preparation of iron precursor:** 1 ml of  $\text{Fe}_3\text{Cl}_3 \cdot 6\text{H}_2\text{O}$  (3mol/l), 3 ml of HCl (0.2mol/l) and 296 ml of  $\text{H}_2\text{O}$  were added in a flask. The solution was refluxing for 2 h, followed by evaporating for several hours to get ca. 50 ml of red solution using rotary evaporator.

**Preparation of carbon spheres adsorbed with iron precursor:** 3 g of glucose and 3 ml of iron precursor were dissolved in 28 ml of  $\text{H}_2\text{O}$  to form a red transparent solution, which was then put in a 50-ml Teflon-sealed autoclave and maintained at 170 °C for 6 h. The products were isolated by centrifugation, cleaned by four cycles of centrifugation/washing/redispersion in ethanol, and dried at 100 °C.

**Preparation of HMS particles:** 0.2 g of carbon spheres adsorbed with iron precursor was dispersed in a solution composed of 200 ml of isopropanol, 40 ml of  $\text{H}_2\text{O}$ , and 6.0 ml of  $\text{NH}_3 \cdot \text{H}_2\text{O}$  (28 wt%). After stirring for 30 min, 0.6 ml of a mixture of tetraethoxysilane (TEOS) and *n*-octadecyltrimethoxysilane (C18TMS) with a molar ratio of 4.7 TEOS : 1 C18TMS was added drop-wise with a 1-ml syringe to the reaction mixture under vigorous stirring and subsequently stirred at room temperature for 8 h. The resultant particles were separated by centrifugation, washed by three cycles of centrifugation/washing/redispersion in ethanol, and dried at room temperature for 24 h. Finally, HMS particles were obtained after the calcination of the as-prepared products in air at 550 °C for 6 h, and the reduction in 5%  $\text{H}_2$ /95% Ar at 400 °C for 2 h.
